# Supplementary material for: Esophagram should be performed to diagnose esophageal perforation before inter-hospital transfer
Source: PubMed Central journal article supplement — J Thorac Dis. 2023 Apr 25;15(6):2984–96. doi: 10.21037/jtd-22-1798 (PMC10323583; doi:10.21037/jtd-22-1798), 2023-04-25
Supplement: jtd-15-06-2984-dss.pdf [file jtd-15-06-2984-dss.pdf]

## Data Sharing Statement

|                     |                                                                                                                                                     |                                                                                                                                                                                                          |
|---------------------|-----------------------------------------------------------------------------------------------------------------------------------------------------|----------------------------------------------------------------------------------------------------------------------------------------------------------------------------------------------------------|
| <b>Article Info</b> | https://dx.doi.org/10.21037/jtd-22-1798                                                                                                             |                                                                                                                                                                                                          |
| <b>Item</b>         | <b>Question</b>                                                                                                                                     | <b>Authors' Response<br/>(place "-" if not applicable)</b>                                                                                                                                               |
| 1                   | Would you like to share data collected for your study to others?                                                                                    | Yes                                                                                                                                                                                                      |
| 2                   | If not, would you like to share the reason for your decision?                                                                                       | -                                                                                                                                                                                                        |
| 3                   | What data in particular will be shared?                                                                                                             | Data regarding transfer time and distance will be shared.                                                                                                                                                |
| 4                   | Any other documents will be shared? Such as study protocol, statistical analysis plan, informed consent form, clinical study report, analytic code. | Statistical analysis can be shared and clarified if desired.                                                                                                                                             |
| 5                   | When will data availability begin?                                                                                                                  | From the publication date.                                                                                                                                                                               |
| 6                   | When will data availability end?                                                                                                                    | Six months following the publication date.                                                                                                                                                               |
| 7                   | To whom will you share the data?                                                                                                                    | Thoracic surgeons who accept potential esophageal perforation transfers.                                                                                                                                 |
| 8                   | For what type of analysis or purpose?                                                                                                               | To assist in larger scale studies of esophageal perforation transfer time.                                                                                                                               |
| 9                   | How or where can the data/documents be obtained?                                                                                                    | Written requests should be mailed to Dr. Christina Stuart, University of Colorado, Department of Surgery.<br>Email: <a href="mailto:christina.stuart@cuanschutz.edu">christina.stuart@cuanschutz.edu</a> |
| 10                  | Any other restrictions?                                                                                                                             | We reserve the right to deny data sharing requests. We may balance the potential benefits and risks for each request on a case by case basis.                                                            |
